# Supplementary material for: The mechanism of the effect of H2O on the low temperature selective catalytic reduction of NO with NH3 over Mn–Fe spinel
Source: Royal Society of Chemistry journal article supplement (doi:10.1039/c4cy01599a), 2015-01-01
Supplement: c4cy01599a1.pdf [file c4cy01599a1.pdf]

## Supporting Information

### **Mechanism of the effect of H<sub>2</sub>O on the low temperature selective catalytic reduction of NO with NH<sub>3</sub> over Mn-Fe spinel**

Shangchao Xiong, Yong Liao, Xin Xiao, Hao Dang, Shijian Yang\*

*School of Environmental and Biological Engineering, Nanjing University of Science and  
Technology, Nanjing, 210094 P. R. China*

---

\* Corresponding author phone: 86-18-066068302; E-mail: [yangshijiangsq@163.com](mailto:yangshijiangsq@163.com) (S. J. Yang).

## 1. Experimental

### 1.1 Catalytic test

The ratios of NO<sub>x</sub> and NH<sub>3</sub> conversion, the amount of N<sub>2</sub> formed, and N<sub>2</sub>O selectivity were calculated using the following equations:

$$\text{NO}_x \text{ conversion} = \frac{[\text{NO}_x]_{\text{in}} - [\text{NO}_x]_{\text{out}}}{[\text{NO}_x]_{\text{in}}} \quad (\text{S1})$$

$$\text{NH}_3 \text{ conversion} = \frac{[\text{NH}_3]_{\text{in}} - [\text{NH}_3]_{\text{out}}}{[\text{NH}_3]_{\text{in}}} \quad (\text{S2})$$

$$\text{N}_2 \text{ formed} = [\text{NO}_x]_{\text{in}} + [\text{NH}_3]_{\text{in}} - [\text{NO}_x]_{\text{out}} - [\text{NH}_3]_{\text{out}} - 2[\text{N}_2\text{O}]_{\text{out}} \quad (\text{S4})$$

$$\text{N}_2\text{O selectivity} = \frac{2[\text{N}_2\text{O}]_{\text{out}}}{[\text{NH}_3]_{\text{in}} + [\text{NO}_x]_{\text{in}} - [\text{NH}_3]_{\text{out}} - [\text{NO}_x]_{\text{out}}} \quad (\text{S4})$$

Where, [NH<sub>3</sub>]<sub>in</sub>, [NO<sub>x</sub>]<sub>in</sub>, [NH<sub>3</sub>]<sub>out</sub>, [NO<sub>x</sub>]<sub>out</sub> and [N<sub>2</sub>O]<sub>out</sub> were the concentrations of NH<sub>3</sub> and NO<sub>x</sub> (including NO and NO<sub>2</sub>) in the inlet, and the concentrations of NH<sub>3</sub>, NO<sub>x</sub> and N<sub>2</sub>O in the outlet, respectively.

### 1.2 In situ DRIFT study

In situ DRIFT spectra were recorded on another FTIR spectrometer (Nicolet 6700) equipped with a smart collector and an MCT detector by accumulating 32 scans with a resolution of 4 cm<sup>-1</sup>.<sup>1</sup>

## 2. Results

### 2.1 In situ DRIFT study

After the adsorption of 500 ppm of NH<sub>3</sub> at 120 °C for 30 min, Mn-Fe spinel was mainly covered by coordinated NH<sub>3</sub> bound to the Lewis acid sites (at 1603 and 1190 cm<sup>-1</sup>) and ionic NH<sub>4</sub><sup>+</sup> bound to the Brønsted acid sites (1669 and 1440 cm<sup>-1</sup>) (shown in Fig. S1a).<sup>2-4</sup> The negative peak at 1340 cm<sup>-1</sup> was assigned to residual SO<sub>4</sub><sup>2-</sup> on Mn-Fe spinel after water washing, which was covered by NH<sub>4</sub><sup>+</sup>.<sup>5-7</sup> After the further introduction of 500 ppm of NO and 2% of O<sub>2</sub>, adsorbed ammonia species gradually diminished (shown in Fig. S1a). Meanwhile, adsorbed H<sub>2</sub>O (at 1620 cm<sup>-1</sup>) appeared, which is the typical product of NO reduction.<sup>2</sup> Furthermore, adsorbed NO<sub>x</sub> cannot be observed during the remarkable decrease of adsorbed NH<sub>3</sub> species in the first 1 min. They suggest that the reaction of adsorbed ammonia species with gaseous NO (i.e. the Eley-Rideal mechanism) contributed to NO reduction over Mn-Fe spinel. At last, Mn-Fe spinel was mainly

covered by monodentate nitrite (at 1608  $\text{cm}^{-1}$ ), monodentate nitrate (at 1548  $\text{cm}^{-1}$ ), and bidentate nitrate (at 1584, 1530, 1277 and 1230  $\text{cm}^{-1}$ ).<sup>4,8</sup>

After the adsorption of 500 ppm of NO and 2% of O<sub>2</sub> at 120 °C, monodentate nitrite (at 1608  $\text{cm}^{-1}$ ), monodentate nitrate (at 1548  $\text{cm}^{-1}$ ), and bidentate nitrate (at 1584, 1530, 1277 and 1230  $\text{cm}^{-1}$ ) appeared on Mn-Fe spinel (shown in Fig. S1b). After NH<sub>3</sub> was introduced, the band at 1608  $\text{cm}^{-1}$  corresponding to monodentate nitrite and the band at 1548  $\text{cm}^{-1}$  corresponding to monodentate nitrate gradually decreased (shown in Fig. S1b). It suggests that the reaction of adsorbed monodentate nitrite/monodentate nitrate with adsorbed NH<sub>3</sub> on the adjacent sites (i.e. the Langmuir-Hinshelwood mechanism) contributed to NO reduction over Mn-Fe spinel. However, the bands at 1584, 1531, 1277 and 1230  $\text{cm}^{-1}$  corresponding to bidentate nitrate shifted to 1566, 1507, 1286 and 1246  $\text{cm}^{-1}$  due to the reaction with adsorbed ammonia species (shown in Fig. S1b).<sup>4</sup> However, their intensities did not decrease after the further introduction of NH<sub>3</sub>/N<sub>2</sub>. It suggests that the reaction between ammonia and bidentate nitrate did not contribute to NO reduction over Mn-Fe spinel due to the stronger binding energy of bidentate nitrate with the interface.<sup>8</sup> The similar result was reported on MnO<sub>x</sub>-CeO<sub>2</sub> by Qi and Yang.<sup>9</sup> Meanwhile, coordinated NH<sub>3</sub> (at 1603 and 1190  $\text{cm}^{-1}$ ) and ionic NH<sub>4</sub><sup>+</sup> (1669 and 1440  $\text{cm}^{-1}$ ) were observed on Mn-Fe spinel. Previous research demonstrated that the product of nitrate route was N<sub>2</sub>O, while that of the nitrite route was N<sub>2</sub>.<sup>10</sup> Therefore, N<sub>2</sub>O formation over Mn-Fe spinel during the introduction of NH<sub>3</sub>/N<sub>2</sub> to NO+O<sub>2</sub> pretreated Mn-Fe spinel mainly resulted from the reaction of adsorbed monodentate nitrate with adsorbed NH<sub>3</sub>.

At last, the IR spectra during the SCR reaction (i.e. 500 ppm of NH<sub>3</sub>, 500 ppm of NO and 2% of O<sub>2</sub> were simultaneously introduced) at 120 °C were recorded. As shown in Fig. S1c, adsorbed H<sub>2</sub>O (at 1620  $\text{cm}^{-1}$ ), coordinated NH<sub>3</sub> (at 1603 and 1190  $\text{cm}^{-1}$ ), ionic NH<sub>4</sub><sup>+</sup> (at 1669 and 1440  $\text{cm}^{-1}$ ) adsorbed bidentate NO<sub>3</sub><sup>-</sup> (at 1584  $\text{cm}^{-1}$ ) and adsorbed NH<sub>4</sub>NO<sub>3</sub> (at 1507 and 1246  $\text{cm}^{-1}$ ) were all observed. Previous study has demonstrated that bidentate nitrate on the surface mainly resulted from the further oxidation of adsorbed NO<sub>2</sub><sup>-</sup>.<sup>11</sup> Therefore, the presence of bidentate nitrate on the surface indicates that the formation of NO<sub>2</sub><sup>-</sup> on Mn-Fe spinel, which was rapidly reacted with NH<sub>3</sub>. Therefore, both the Langmuir-Hinshelwood mechanism and the Eley-Rideal mechanism contributed to NO reduction over Mn-Fe spinel.

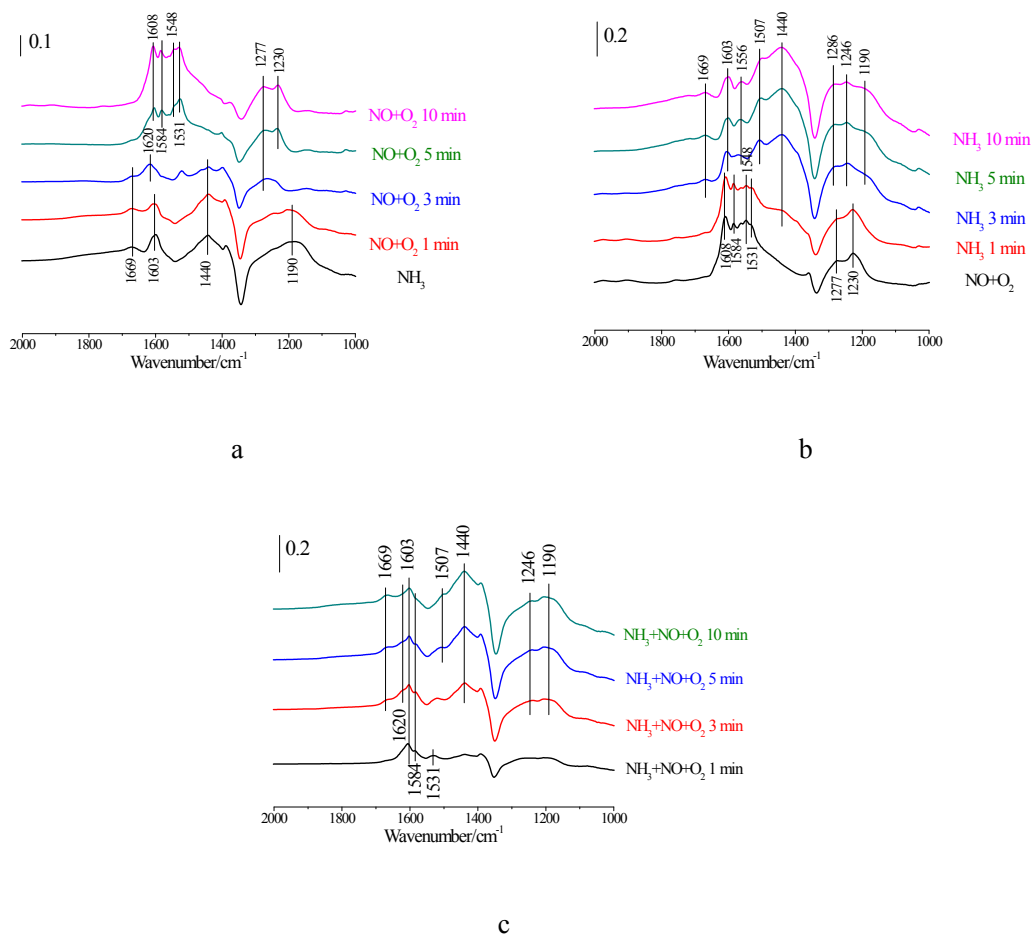

**Fig. S1** (a), DRIFT spectra taken at 120 °C upon passing NO+O<sub>2</sub> over NH<sub>3</sub> presorbed Mn-Fe spinel; (b), DRIFT spectra taken at 120 °C upon passing NH<sub>3</sub> over NO+O<sub>2</sub> presorbed Mn-Fe spinel; (c), DRIFT spectra taken at 120 °C upon passing NH<sub>3</sub>+NO+O<sub>2</sub> over Mn-Fe spinel.

## References:

1. L. A. Chen, J. H. Li and M. F. Ge, *Environ. Sci. Technol.*, 2010, 44, 9590-9596.
2. G. S. Qi and R. T. Yang, *J. Phys. Chem. B*, 2004, 108, 15738-15747.
3. Z. B. Wu, B. Q. Jiang, Y. Liu, H. Q. Wang and R. B. Jin, *Environ. Sci. Technol.*, 2007, 41, 5812-5817.
4. S. Yang, C. Wang, J. Li, N. Yan, L. Ma and H. Chang, *Appl. Catal. B-environ*, 2011, 110, 71-80.
5. F. D. Liu, K. Asakura, H. He, W. P. Shan, X. Y. Shi and C. B. Zhang, *Appl. Catal. B-environ*, 2010, 103, 369-377.
6. S. J. Yang, C. X. Liu, H. Z. Chang, L. Ma, Z. Qu, N. Q. Yan, C. Z. Wang and J. H. Li, *Ind. Eng. Chem. Res.*, 2013, 52, 5601-5610.
7. S. J. Yang, Y. F. Guo, H. Z. Chang, L. Ma, Y. Peng, Z. Qu, N. Q. Yan, C. Z. Wang and J. H. Li, *Appl. Catal. B-environ*, 2013, 136, 19-28.
8. K. I. Hadjiivanov, *Catal. Rev.*, 2000, 42, 71-144.
9. G. S. Qi and R. T. Yang, *J. Catal.*, 2003, 217, 434-441.
10. G. Madia, M. Koebel, M. Elsener and A. Wokaun, *Ind. Eng. Chem. Res.*, 2002, 41, 4008-4015.
11. M. Machida, M. Uto, D. Kurogi and T. Kijima, *J. Mater. Chem.*, 2001, 11, 900-904.
